# Supplementary material for: Carbon Quantum Dots for Stem Cell Imaging and Deciding the Fate of Stem Cell Differentiation
Source: PubMed Central journal article supplement — ACS Omega. 2022 Aug 11;7(33):28685–93. doi: 10.1021/acsomega.2c03285 (PMC9404166; doi:10.1021/acsomega.2c03285), 2022-08-11
Supplement: ao2c03285_si_001.pdf [file ao2c03285_si_001.pdf]

# Authors Biography

## MISBA MAJOOD

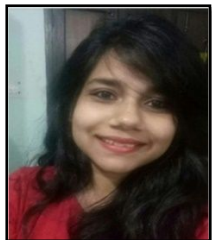

Misba Majood is a Ph.D. scholar at Amity Institute of Click Chemistry Research and Studies, Amity University Uttar Pradesh. She did her B.Tech & M.Tech in Biotechnology from Amity Institute of Biotechnology, Amity University Uttar Pradesh. Currently, her research is focused on carbon-based nanomaterials or nanocomposites for stem cell proliferation and differentiation.

## PIYUSH GARG

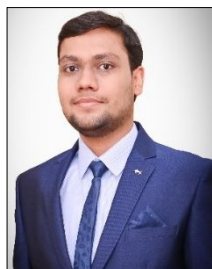

**Piyush Garg** received his B. Tech. + M. Tech. dual degree in Biotechnology from Amity University (Noida). During his undergraduate study, joined as a Research Trainee at the Molecular Science and Engineering Laboratory under the supervision of Professor Monalisa Mukherjee at Amity Institute of Click Chemistry Research and Studies, Amity University (Noida), U.P., India. His current research focuses on the biomedical applications of carbon-based nanomaterials, polymer nanocomposites and investigating degradable materials for ocular drug delivery.

## RADHIKA CHAURASIA

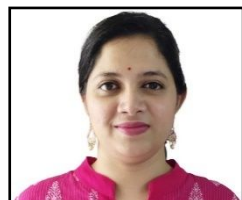

Radhika Chaurasia received M. Pharm from National Institute of Pharmaceutical Education and Research (NIPER) Hajipur, India. Presently, Women Scientist in DST sponsored project and pursuing PhD at Amity Institute of Click Chemistry and Studies (AICCRS), Amity University, Noida, India.

## AAKANKSHA AGARWAL

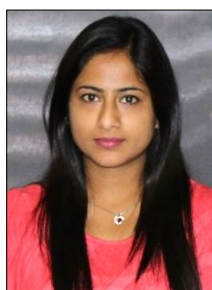

Aakanksha Agarwal received M.Sc. (Microbiology) from Gurukul Kangri University, Haridwar, Uttarakhand, India. She received Ph.D. in Molecular Sciences and Engineering from Amity Institute of Click Chemistry Research and Studies (AICCRS), Amity University, Noida, India. Her current research focuses on the synthesis and characterization of carbon-based nanomaterials, algal nanobionics, and recent advances towards sustainable production of biomass, bioactive components and lipid molecules from microalgae using heterogeneous carbon nanomaterials and hydrogel nanocomposites. She also focussing on the algal biomass-based hydrogel scaffolds as a biomimetic platform with antibacterial and wound healing activities.

### **PROF. SUJATA MOHANTY**

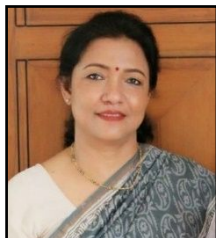

Prof. Sujata Mohanty completed her PhD from All India Institute of Medical Sciences (AIIMS), New Delhi, India and her Post-doc from Mount Sinai School of Medicine New York, USA. She received special training in Embryonic Stem Cell Culture from Univ. of Georgia, Atlanta, USA. She is currently serving as Professor in Stem Cells Facility, & heading DBT-COE in Stem Cell Research, AIIMS, New Delhi. Her area of work is Stem Cells Biology, Regenerative Nanomedicine, Tissue Engineering and Organoid Development. She is the Chairperson and member of many reputed scientific communities. She has been instrumental in conducting many multicentric, randomised clinical trials and has several publications and patents.

### **PROF. MONALISA MUKHERJEE**

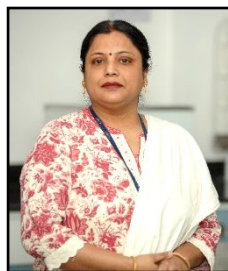

Prof. Monalisa Mukherjee completed her Bachelors and Master degree from University of North Bengal, India. She received her Ph. D. from CBME, IIT (Delhi) in 2006. Presently, she is serving as Director at Amity Institute of Click Chemistry Research & Studies and Professor at Amity Institute of Biotechnology, Amity University (Noida), U.P., India. She is also the recipient of UK-India Distinguished Visiting Scientist award and admitted as a fellow of Royal Society of Chemistry (FRSC), London, UK, in 2021. During the past 5 years, Dr. Mukherjee has made exemplary contributions to the field of Materials Science. Her research is not only reinforced by her remarkable publications and patents but also by its translational potential.
